# Supplementary material for: Gas–liquid phase equilibrium of a model Langmuir monolayer captured by a multiscale approach
Source: Royal Society of Chemistry journal article supplement (doi:10.1039/c8cp05447a), 2018-10-17
Supplement: c8cp05447a1.pdf [file c8cp05447a1.pdf]

## SUPPLEMENTARY INFORMATION

# Gas–Liquid Phase Equilibrium of a Model Langmuir Monolayer Captured by a Multiscale Approach

Ahmad Moghimikheirabadi<sup>\*1</sup>, Leonard M. C. Sagis<sup>2</sup>, Martin Kröger<sup>1</sup>, and Patrick Ilg<sup>3</sup>

<sup>1</sup>*Polymer Physics, Department of Materials, ETH Zurich, CH-8093 Zurich, Switzerland.*

<sup>2</sup>*Food Physics Group, Wageningen University, Bornse Weiland 9, 6708 WG Wageningen, The Netherlands.*

<sup>3</sup>*School of Mathematical, Physical and Computational Sciences, University of Reading, Reading, RG6 6AX, UK.*

## Contents

|          |                                                              |           |
|----------|--------------------------------------------------------------|-----------|
| <b>1</b> | <b>3D reference simulations</b>                              | <b>S2</b> |
| 1.1      | Radial distribution functions of w-H and w-w pairs . . . . . | S2        |
| 1.2      | Force-matching scheme . . . . .                              | S2        |
| <b>2</b> | <b>Gibbs ensemble Monte Carlo (GEMC)</b>                     | <b>S3</b> |
| 2.1      | Particle displacement . . . . .                              | S3        |
| 2.2      | Area exchange . . . . .                                      | S3        |
| 2.3      | Particle exchange . . . . .                                  | S4        |
| 2.4      | Implementation details . . . . .                             | S4        |
| <b>3</b> | <b>Density functional theory (DFT)</b>                       | <b>S4</b> |
| 3.1      | Chemical potential of the hard-disc fluid . . . . .          | S4        |
| 3.2      | Coefficient $\alpha$ and disc diameter $d$ . . . . .         | S5        |
| 3.3      | Coexistence properties and phase diagram . . . . .           | S5        |
| 3.4      | Density profile and line tension . . . . .                   | S6        |

---

\*Fax: +41 44 632 10 76; Tel: +41 44 633 92 32; E-mail: ahmad.moghimikheirabadi@mat.ethz.ch

# 1 3D reference simulations

## 1.1 Radial distribution functions of w-H and w-w pairs

As was discussed in the paper, w particles prefer H segments as neighbors over their own species. We verify this observation by calculating the radial distribution functions (rdf) of w-H and w-w pairs as given in Fig S1a. It is seen that the first peak in rdf is more pronounced for H-w pairs (solid line) and takes place at a smaller radial distance with respect to that of the w-w pairs (dash-dotted line). The average hydration number as a function of radial distance is calculated as

$$N_w(r) = 4\pi\rho_w \int_0^r r'^2 g(r') dr', \quad (\text{S1})$$

and presented in Fig. S1b for H and w particles. It clearly shows that for small radial distances (say less than  $1.3\sigma$ ), H segments have a larger hydration number than w particles.

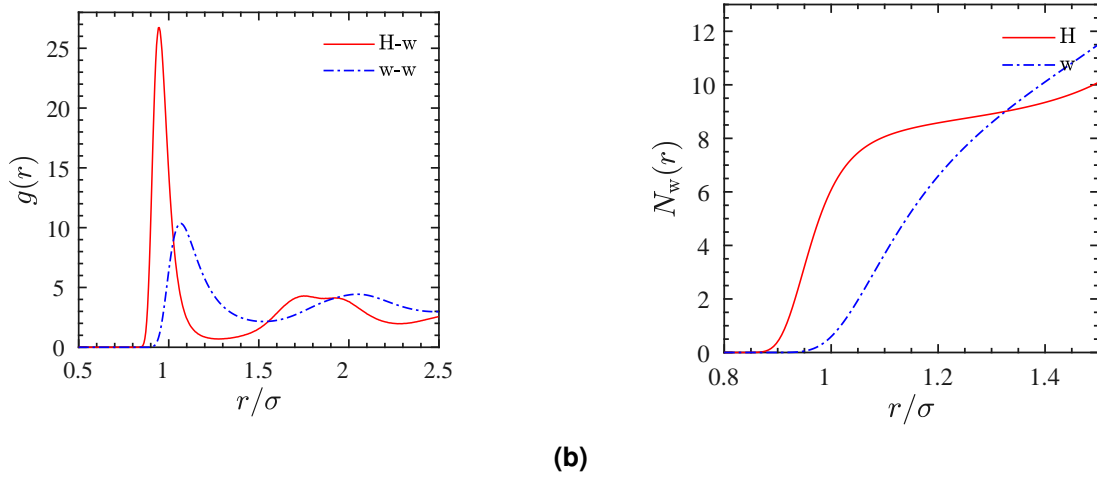

**Figure S1** (a) Pair correlation functions of H-w (solid line) and w-w (dash-dotted line) pairs. (b) Average number of neighboring w particles located until distance  $r$ ,  $N_w(r)$ , for H groups (solid line) and w (dash-dotted line) particles.

## 1.2 Force-matching scheme

In order to calculate the CG force field  $F_{CG}(r)$  numerically, we consider a cut-off distance  $r_c$  beyond which the radial force is assumed to be zero. The interval  $[0, r_c]$  is meshed with equidistantly spaced grid points  $\{r_i; i = 1, \dots, \nu\}$  at  $r_i/r_c = (i-1)/(\nu-1)$  so that  $r_1 = 0$  and  $r_\nu = r_c$ . We consider a function space  $\{f_i\}$  of linear spline basis functions<sup>1,2</sup> as

$$f_i(r) = \begin{cases} \frac{r-r_{i-1}}{r_i-r_{i-1}}, & r_{i-1} < r \leq r_i, & i > 1 \\ \frac{r_{i+1}-r}{r_{i+1}-r_i}, & r_i < r \leq r_{i+1}, & i < \nu \\ 0, & \text{otherwise,} \end{cases} \quad (\text{S2})$$

and take  $F_{CG}(r)$  to be represented by  $\nu$  coefficients  $\{F_i\}$  as

$$F_{CG}(r) = \sum_{i=1}^{\nu} F_i f_i(r). \quad (\text{S3})$$

This representation implies that  $F_{CG}(r)$  is a piecewise continuous linear function, and the coefficients  $\{F_i\}$  are the radial forces at the grid points  $\{r_i\}$  as

$$F_i = F_{CG}(r_i), \quad (\text{S4})$$

subjected to the boundary condition of  $F_\nu = 0$ . In the following, we discuss how to calculate coefficients  $\{F_i\}$  by matching the forces in the CG system with the reference system through minimizing the residual  $\chi^2(\mathbf{F})$ . By

plugging Eq. S3 into Eq. 15, we rewrite the CG force  $\mathbf{F}_I$  in terms of coefficients  $\{F_i\}$  as

$$\mathbf{F}_I = \sum_{i=1}^v F_i \mathbf{a}_{iI}, \quad (\text{S5})$$

where

$$\mathbf{a}_{iI} = \sum_{J=1, \neq I}^{N_{\text{int}}} f_i(|\mathbf{R}_I - \mathbf{R}_J|) \frac{\mathbf{R}_I - \mathbf{R}_J}{|\mathbf{R}_I - \mathbf{R}_J|}, \quad (\text{S6})$$

is known since it is only dependent on projected surfactant center-of-masses and the function space  $\{f_i\}$ . Combining Eqs. S5 and 15 results in a linear least-squares problem as

$$\chi^2(\{F_i\}) = \left\langle \frac{1}{2N_{\text{int}}} \sum_{I=1}^{N_{\text{int}}} \left| \sum_{i=1}^v F_i \mathbf{a}_{iI} - \mathbf{f}_I \right|^2 \right\rangle, \quad (\text{S7})$$

where the coefficients  $\{F_i\}$  are to be determined numerically. To this end, we solve equivalently an overdetermined linear system of equations<sup>2-4</sup> obtained by equalizing  $x$  and  $y$  components of the total force ( $\mathbf{f}_I$ ) exerted on each surfactant center-of-mass at each reference configuration with the corresponding CG force ( $\mathbf{F}_I$ ) in terms of fitting coefficients  $\{F_i\}$ . After some trial and errors, we set the cut-off distance to  $r_c = 10\sigma$  (not to be confused with  $r_{\text{cut}}$  in the manuscript) and consider a nonuniform radial mesh with 358 grid points as  $\{r_i/\sigma\} = \{0, 1.1, 1.125, \dots, 9.975, 10\}$ . We note that intermolecular distances with very small separation (say less than  $1.1\sigma$  in our cases) are rarely sampled, and hence one can not accurately estimate the value of the forces  $\{F_i\}$  in this region. That is why we have considered only one coarse mesh in the interval  $[0, 1.1]$  and safely assumed<sup>1</sup>  $F_1 = F_2$ . We approximate the solution in a block-averaging<sup>1</sup> approach where we partition configurations into disjoint blocks each of which consists roughly of 80000 equations (e.g. for a simulation consisting of 400 surfactants, 50 blocks with the size of 100 each). We then solve the overdetermined linear system of equations in each block by using the LSQR<sup>5,6</sup> algorithm and subsequently average the results of  $\{F_i\}$  over different blocks.

## 2 Gibbs ensemble Monte Carlo (GEMC)

### 2.1 Particle displacement

To sample equilibrium configurations within each simulation box we perform displacements of randomly selected particles in a randomly selected region according to the following acceptance probability<sup>7,8</sup>

$$\mathcal{P}_{\text{disp}, \kappa} = \min(1, \exp[-\beta \Delta U_{\text{disp}}^\kappa]), \quad \kappa = \{le, g\} \quad (\text{S8})$$

where  $\Delta U_{\text{disp}}^\kappa$  denotes the change in the internal energy of phase  $\kappa$  due to the particle displacement.

### 2.2 Area exchange

For the area change trial moves, we perform a random walk in  $\ln(A^l/A^g)$  with the acceptance probability  $\mathcal{P}_{\text{area}}$ , described by<sup>7</sup>

$$\mathcal{P}_{\text{area}} = \min \left( 1, \left( \frac{A^{le} + \Delta A}{A^{le}} \right)^{N^{le}+1} \left( \frac{A^g - \Delta A}{A^g} \right)^{N^g+1} \exp \left[ -\beta \left( \Delta U_{\text{area}}^{le} + \Delta U_{\text{area}}^g \right) \right] \right), \quad (\text{S9})$$

where  $\Delta A$  is the area change in region  $le$  (and hence  $-\Delta A$  is the area change in region  $g$ ) and  $\Delta U_{\text{area}}^\kappa$ ,  $\kappa = \{le, g\}$ , is the change in the internal energy of phase  $\kappa$  associated with that area change. These trial moves result in the pressure equality of the two coexisting phases.

### 2.3 Particle exchange

Finally, we transfer a randomly selected particle from a randomly selected phase to the other to ensure the chemical equilibrium between two coexisting regions. The acceptance probability of removing a particle from phase  $le$ , and inserting that in phase  $g$  is given by<sup>7,8</sup>

$$\mathcal{P}_{\text{ex}} = \min \left( 1, \frac{N^{le} A^g}{(N^g + 1) A^{le}} \exp \left[ -\beta \left( \Delta U_{\text{ex}}^{le} + \Delta U_{\text{ex}}^g \right) \right] \right) \quad (\text{S10})$$

where  $\Delta U_{\text{ex}}^{\kappa}$ ,  $\kappa = \{le, g\}$ , is the change in the internal energy of box  $\kappa$  associated with the particle insertion for  $g$  and particle removal for  $le$  phases.

### 2.4 Implementation details

We considered two periodic simulation boxes each with initial dimensions as  $50\sigma \times 50\sigma$ . A total number of 500 particles are equally distributed between the two boxes. For each MC step, we perform 500 particle displacements (with the acceptance rate of  $40 \pm 5\%$ ), 10 area change and 10 particle exchange trial moves in a random order. For the first  $5 \times 10^4$  steps, we only perform particle displacements within the individual boxes without any area change or particle exchange moves. Subsequently, we perform  $1.5 \times 10^5$  full MC steps, including particle exchange and area change moves. During this interval, we monitor the densities in the two boxes to make sure they are constant (but with a different value at each box, in case of coexistence) within the statistical fluctuations. Finally, we sample equilibrium configurations once every 20 steps for the next  $10^5$  MC steps.

## 3 Density functional theory (DFT)

In this section, we discuss different building blocks of our 2D DFT approach, and the numerical methods for calculating coexistence properties, density profiles across the G-LE dividing line and the corresponding line tensions.

### 3.1 Chemical potential of the hard-disc fluid

To obtain an expression for the chemical potential of the hard-disc fluid, and hence its free energy, we write down the Gibbs-Duhem relation for a constant temperature process as<sup>9</sup>

$$d\Pi_{\text{hd}} = \rho d\mu_{\text{hd}}, \quad T = \text{cst.} \quad (\text{S11})$$

Subtracting the same equation applied to an ideal gas at the same density, multiplying by  $\beta = 1/k_{\text{B}}T$  and dividing by  $d\rho$  results in

$$\left. \frac{\partial \beta \mu_{\text{hd}}^{\text{ex}}}{\partial \rho} \right|_T = \frac{1}{\rho} \left. \frac{\partial \beta \Pi_{\text{hd}}^{\text{ex}}}{\partial \rho} \right|_T \quad (\text{S12})$$

where  $p_{\text{hd}}^{\text{ex}}$  and  $\mu_{\text{hd}}^{\text{ex}}$  are excess properties of the hard-disc fluid. By using the ideal gas law and the hard-disc equation of state<sup>10</sup> (Eq. 29), we obtain  $\beta p_{\text{hd}}^{\text{ex}}$  as

$$\beta \Pi_{\text{hd}}^{\text{ex}}(\rho) = \beta \Pi_{\text{hd}} - \beta \Pi_{\text{hd}}^{\text{id}} = \frac{\rho}{(1-\eta)^2} - \rho, \quad \eta = \frac{\pi}{4} \rho d^2. \quad (\text{S13})$$

Integrating Eq. S12, we obtain

$$\beta \mu_{\text{hd}}^{\text{ex}}(\rho) - \beta \mu_{\text{hd}}^{\text{ex}}(\rho_0) = \int_{\rho_0}^{\rho} \frac{1}{\eta'} \left( \frac{\partial \beta \Pi_{\text{hd}}^{\text{ex}}}{\partial \rho'} \right) d\eta', \quad (\text{S14})$$

and by replacing Eq. S13 into this integral we get

$$\beta \mu_{\text{hd}}^{\text{ex}}(\rho) - \beta \mu_{\text{hd}}^{\text{ex}}(\rho_0) = \left[ -\ln(1-\eta) + \frac{1}{1-\eta} + \frac{2\eta - \eta^2}{(1-\eta)^2} \right]_{\eta_0}^{\eta}. \quad (\text{S15})$$

In the limit where  $\rho_0 \rightarrow 0$  (and hence  $\eta_0 \rightarrow 0$ ), the hard-disc fluid behaves like an ideal gas and  $\beta\mu_{\text{hd}}^{\text{ex}}(\rho_0) \rightarrow 0$ , therefore the excess chemical potential can be evaluated from Eq. S15 as

$$\beta\mu_{\text{hd}}^{\text{ex}}(\rho) = -\ln(1-\eta) + \frac{3\eta - 2\eta^2}{(1-\eta)^2}. \quad (\text{S16})$$

Finally, the full chemical potential is obtained by adding the ideal gas contribution and then reads

$$\beta\mu_{\text{hd}}(\rho) = \beta\mu_{\text{hd}}^{\text{ex}}(\rho) + \beta\mu_{\text{hd}}^{\text{id}}(\rho) = \ln\Lambda^2\rho - \ln(1-\eta) + \frac{3\eta - 2\eta^2}{(1-\eta)^2}, \quad (\text{S17})$$

where  $\Lambda$  is the thermal de Broglie wavelength.

### 3.2 Coefficient $\alpha$ and disc diameter $d$

The coefficient  $\alpha$  is calculated as  $21.43 \pm 0.74 \epsilon\sigma^2$  by using tabulated values of  $U^{\text{att}}(r)$  and carrying out the following integral by using the trapezoidal rule

$$\alpha = - \int_0^{r_c} 2\pi r U^{\text{att}}(r) dr, \quad (\text{S18})$$

with  $r_c$  from above. Similarly,  $d_{\text{BH}}(T)$  is numerically calculated from Eq. 27 by using tabulated values of the repulsive branch of the interaction potential  $U^{\text{rep}}(r)$ , and its values at different temperatures are shown in Fig. S2.

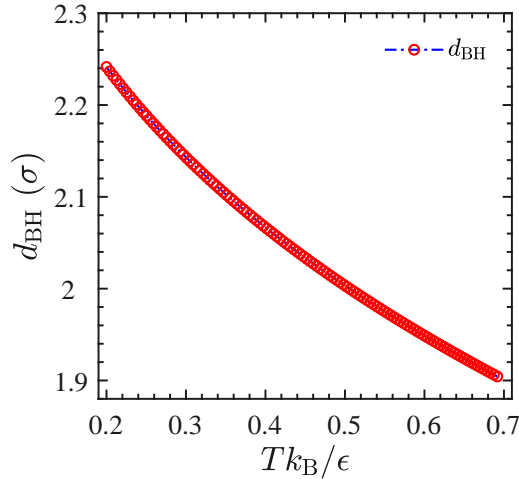

**Figure S2** Hard disc diameter,  $d_{\text{BH}}(T)$ , for 2D fluid of surfactant center-of-masses at different temperatures.

### 3.3 Coexistence properties and phase diagram

To calculate the coexisting densities  $\rho_g^*$  and  $\rho_l^*$  at given  $T$  we basically follow the procedure described earlier by us in another context.<sup>11</sup> Within the region of coexistence the spinodal equation, following from Eq. 34 (etc.)

$$\frac{d^2 f}{d\rho^2} = \frac{d\mu}{d\rho} = \frac{16k_B T}{\rho} \frac{(4 + \pi d^2 \rho)}{(4 - \pi d^2 \rho)^3} - \alpha = 0 \quad (\text{S19})$$

can be solved analytically for two spinodal densities  $\rho_g^{\text{spi}} < \rho_l^{\text{spi}}$ . The value for the chemical potential we are looking for must assume this value at some yet to be determined  $\rho^*$  located between the spinodal densities. Because pressures and chemical potentials are identical for the coexisting states (binodal), the desired  $\rho^* \in [\rho_g^{\text{spi}}, \rho_l^{\text{spi}}]$  has the feature – known as Maxwell’s construction – that a net area  $\Delta I$  in the  $\mu$ – $\rho$ –diagram vanishes. More formally,

$$\Delta I(\rho^*) \equiv I_-(\rho^*) - I_+(\rho^*) = 0 \quad (\text{S20})$$

with partial areas defined by

$$I_-(\rho^*) = \int_0^{\rho^*} \max[0, \mu(\rho) - \mu(\rho^*)] d\rho, \quad (\text{S21})$$

$$I_+(\rho^*) = \int_{\rho^*}^1 \max[0, \mu(\rho^*) - \mu(\rho)] d\rho \quad (\text{S22})$$

Calculating  $\rho^*$  thus amounts to finding the root of a known scalar function  $\Delta I(\rho^*)$  of a single variable  $\rho^*$ , which is computationally inexpensive. Since  $I_-(\phi_g^{\text{spi}}) = I_+(\phi_{le}^{\text{spi}}) = 0$  and  $I_-(\phi_{le}^{\text{spi}}) > 0$  and  $I_+(\phi_g^{\text{spi}}) > 0$ , there is exactly one such root  $\rho^* \in [\rho_g^{\text{spi}}, \rho_{le}^{\text{spi}}]$ . With this root  $\rho^*$  at hand we know the value of the chemical potential in the coexisting phases,  $\mu_\kappa^* \equiv \mu(\rho_\kappa^*) = \mu(\rho^*)$  for  $\kappa \in \{g, le\}$ , and herefrom the coexisting densities  $\rho_\kappa^*$  as well. The pressures  $p_\kappa^* = p(\rho_\kappa^*)$  are identical by construction, because

$$\begin{aligned} \Pi_g^* - \Pi_{le}^* &= -f(\rho_g^*) + \rho_g^* \mu_g^* + f(\rho_{le}^*) - \rho_{le}^* \mu_{le}^* \\ &= \int_{\rho_g^*}^{\rho_{le}^*} \mu(\rho) d\rho - (\rho_{le}^* - \rho_g^*) \mu(\rho^*) = \Delta I(\rho^*) = 0 \end{aligned} \quad (\text{S23})$$

actually proving and hereby employing the Maxwell construction of equal areas  $I_-$  and  $I_+$ .

### 3.4 Density profile and line tension

For a given  $T$ , the value of the chemical potential at coexistence,  $\mu \equiv \mu_{le}^* = \mu_g^*$ , will be used to solve Eq. 43, which we repeat here as

$$\mu_{\text{hd}}(\rho^{i+1}(y)) = \mu - \int d\mathbf{r}' U^{\text{att}}(|\mathbf{r} - \mathbf{r}'|) \rho^i(y'). \quad (\text{S24})$$

We consider a semi-infinite rectangular domain in the  $xy$ -plane, with a length of  $y_{\text{max}} = 100\sigma$  in the  $y$ -direction and a very large length ( $L \rightarrow \infty$ ) in the  $x$ -direction. For a spherically symmetric potential  $U^{\text{att}}(r)$  with a cut-off  $r_c$ , Eq. S24 can be written as

$$\mu_{\text{hd}}(\rho^{i+1}(y)) = \mu - \int_0^{2\pi} \int_0^{r_c} r' U^{\text{att}}(r') \rho^i(y + r' \sin \theta) dr' d\theta. \quad (\text{S25})$$

We mesh the interval  $[0, y_{\text{max}}]$  with 201 equally spaced grid points in the  $y$ -direction (and hence resolve the density profile in this region). For the regions beyond this domain, which correspond to the gas and liquid bulk phases with uniform densities, we assume

$$\begin{cases} \rho(y) = \rho(0), & y < 0 \\ \rho(y) = \rho(y_{\text{max}}), & y > y_{\text{max}}. \end{cases} \quad (\text{S26})$$

The iterations are then started by a nonuniform density profile, e.g. half of the grid points taking the value of  $\rho_l$  and the other half  $\rho_g$ . For each grid point  $y_j$ , the double integral in the right-hand-side (RHS) of Eq. S25 is evaluated (by knowing  $\rho^i$  profile from the previous iteration) numerically using trapezoidal method where we considered 101 grid points in the  $r$ -direction (to mesh the interval  $[0, r_c]$ ) and 51 grid points in the  $\theta$ -direction. The values of  $\mu_{\text{hd}}(\rho^{i+1}(y_j))$  are then used to solve Eq. 30 for  $\rho^{i+1}(y_j)$ . We continue iterations until meeting the stopping criterion as

$$\int_0^{y_{\text{max}}} (\rho^{i+1}(y) - \rho^i(y))^2 dy \leq 10^{-6} \int_0^{y_{\text{max}}} \rho^i(y)^2 dy, \quad (\text{S27})$$

and denote the converged density profile as  $\rho(y)$ . We note that the convergence was achieved in our cases with roughly 7 iterations.

The grand potential,  $\Omega$ , we calculate using this  $\rho(y)$ , and performing the integral in Eq. 45 over the 2D domain as

$$\Omega = L \int_0^{y_{\text{max}}} [f_{\text{hd}}(\rho(y)) - \mu \rho(y)] dy + \frac{L}{2} \int_0^{y_{\text{max}}} g(y) \rho(y) dy, \quad (\text{S28})$$

where  $g(y)$  is the integral on the right hand side of Eq. S25, i.e.,

$$g(y) = \mu - \mu_{\text{hd}}(\rho(y)). \quad (\text{S29})$$

The line tension  $\gamma_{\text{line}}$  simply follows from Eq. 46 as

$$\gamma_{\text{line}} = \frac{\Omega}{L} + \Pi_{\text{y}_{\text{max}}}. \quad (\text{S30})$$

where  $\Pi \equiv \Pi_{\text{le}}^* = \Pi_{\text{g}}^*$  is the pressure of the coexisting phases.

## References

- 1 W. G. Noid, P. Liu, Y. Wang, J.-W. Chu, G. S. Ayton, S. Izvekov, H. C. Andersen and G. A. Voth, *J. Chem. Phys.*, 2008, **128**, 244115.
- 2 A. Moghimikheirabadi, L. M. C. Sagis and P. Ilg, *Phys. Chem. Chem. Phys.*, 2018, **20**, 16238–16246.
- 3 S. Izvekov and G. A. Voth, *J. Phys. Chem. B*, 2005, **109**, 2469–2473.
- 4 S. Izvekov and G. A. Voth, *J. Chem. Phys.*, 2005, **123**, 134105.
- 5 C. C. Paige and M. A. Saunders, *ACM Trans. Math. Softw.*, 1982, **8**, 43–71.
- 6 C. C. Paige and M. A. Saunders, *ACM Trans. Math. Softw.*, 1982, **8**, 195–209.
- 7 D. Frenkel and B. Smit, in *Understanding Molecular Simulation*, Academic Press, San Diego, 2nd edn., 2002, pp. 201–224.
- 8 A. Z. Panagiotopoulos, *Mol. Phys.*, 1987, **61**, 813–826.
- 9 I. Kusaka, in *Statistical Mechanics for Engineers*, Springer International Publishing, 2015, pp. 259–308.
- 10 E. Helfand, H. L. Frisch and J. L. Lebowitz, *J. Chem. Phys.*, 1961, **34**, 1037–1042.
- 11 A. Halperin and M. Kröger, *Macromolecules*, 2011, **44**, 6986–7005.
